# Supplementary material for: Oxidative Stress Accelerates Repeat Instability and Base Substitutions, Promoting Gastrointestinal Driver Mutations under MSH2 Deficiency
Source: Research Square preprint supplement (doi:10.21203/rs.3.rs-7372595/v1), 2025-08-25
Supplement: Supplementary file [file 2e14ca3cad4cd269ceabd83b.pdf]

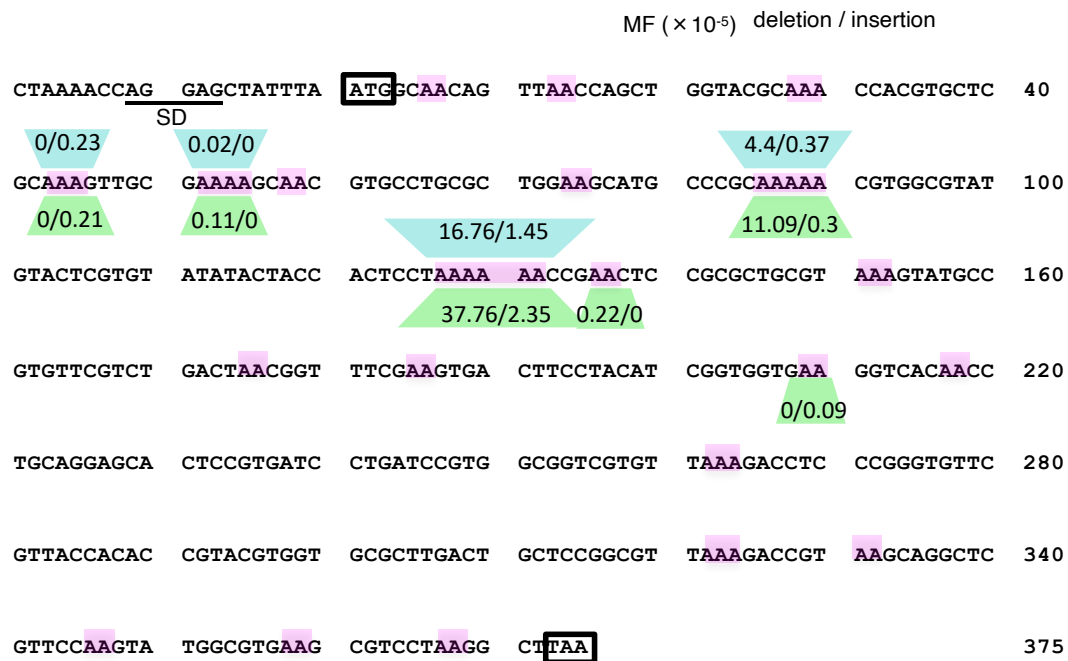

Supplemental Figure S1. Hotspots of adenine 1-indel mutations in the *rpsL* gene

The mutation frequency (MF) of adenine 1-indel was calculated and mapped onto the *rpsL* coding sequence. The MF of deletion (left) and insertion (right) at each locus is indicated as deletion/insertion within colored panels. blue: control mice, blue: KBrO<sub>3</sub>-treated mice. SD: Shine-Dalgarno sequence. Squares indicate start and stop codons. Mononucleotide adenine repeat sequences [(A)<sub>n</sub>] are highlighted in magenta. The (A)<sub>6</sub> site emerged as the most frequent hotspot for adenine 1-indel mutations, followed by the (A)<sub>5</sub> site.

A

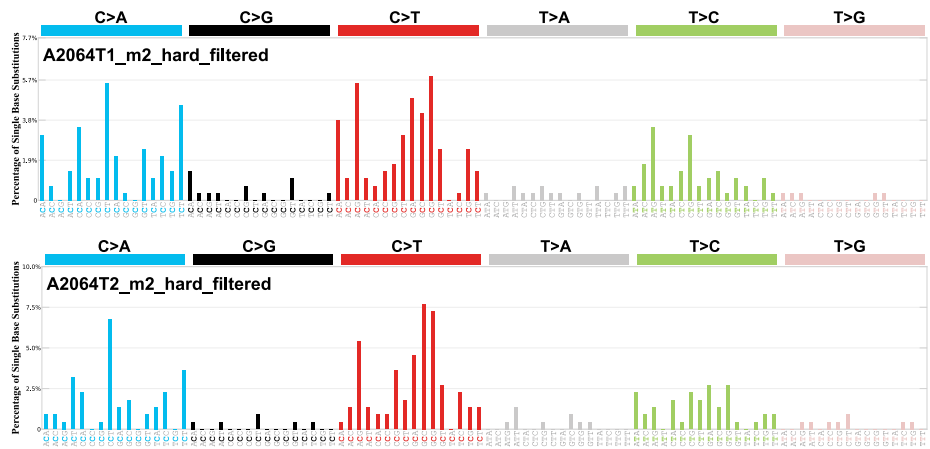

B

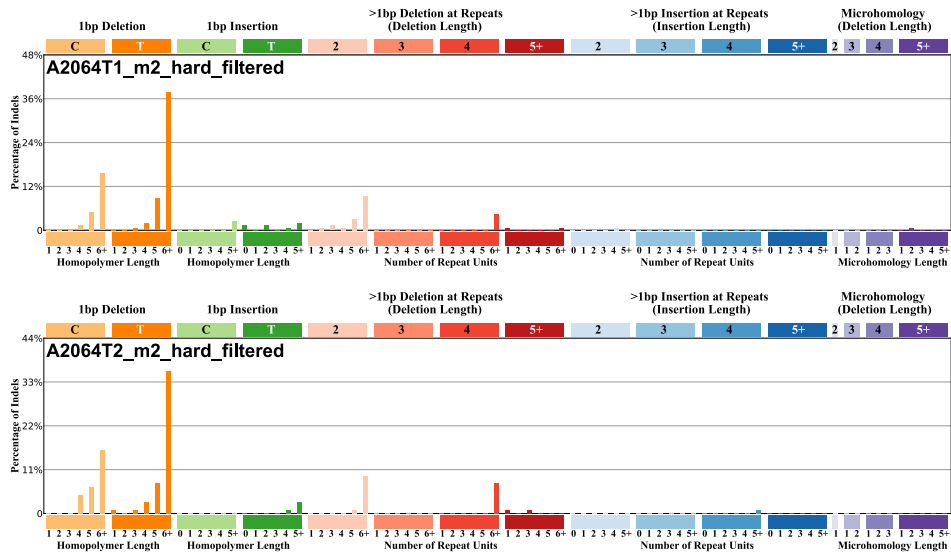

Supplemental Fig S2. Mutational profiles in *Msh2*<sup>-/-</sup> tumor

Mutational profiles based on tumor-specific variants identified using WES of tumors. Two tumors were isolated from a *Msh2*<sup>-/-</sup> mouse treated with 0.15% KBrO<sub>3</sub>. (A) SBS signature. (B) ID signature.
